# Supplementary material
Source: PubMed Central journal article supplement (PMC8142901)
Supplement: NIHMS1659604-supplement-009203_permissions.pdf [file NIHMS1659604-supplement-009203_permissions.pdf]

**ELSEVIER LICENSE  
TERMS AND CONDITIONS**

Dec 16, 2020

---

---

This Agreement between Dr. Lynda Rosenfeld ("You") and Elsevier ("Elsevier") consists of your license details and the terms and conditions provided by Elsevier and Copyright Clearance Center.

|                              |                                                                                                                                                                                                                                        |
|------------------------------|----------------------------------------------------------------------------------------------------------------------------------------------------------------------------------------------------------------------------------------|
| License Number               | 4958831124975                                                                                                                                                                                                                          |
| License date                 | Nov 30, 2020                                                                                                                                                                                                                           |
| Licensed Content Publisher   | Elsevier                                                                                                                                                                                                                               |
| Licensed Content Publication | Heart Rhythm                                                                                                                                                                                                                           |
| Licensed Content Title       | HRS Expert Consensus Statement on the Diagnosis and Management of Arrhythmias Associated With Cardiac Sarcoidosis                                                                                                                      |
| Licensed Content Author      | David H. Birnie, William H. Sauer, Frank Bogun, Joshua M. Cooper, Daniel A. Culver, Claire S. Duvernoy, Marc A. Judson, Jordana Kron, Davendra Mehta, Jens Cosedis Nielsen, Amit R. Patel, Tohru Ohe, Pekka Raatikainen, Kyoko Soejima |
| Licensed Content Date        | Jul 1, 2014                                                                                                                                                                                                                            |
| Licensed Content Volume      | 11                                                                                                                                                                                                                                     |
| Licensed Content Issue       | 7                                                                                                                                                                                                                                      |

Permission for Supplemental Tables 1 and 4:

|                                                     |                                                                           |
|-----------------------------------------------------|---------------------------------------------------------------------------|
| <b>Licensed Content Pages</b>                       | 20                                                                        |
| <b>Start Page</b>                                   | 1304                                                                      |
| <b>End Page</b>                                     | 1323                                                                      |
| <b>Type of Use</b>                                  | reuse in a journal/magazine                                               |
| <b>Requestor type</b>                               | medical educational                                                       |
| <b>Portion</b>                                      | figures/tables/illustrations                                              |
| <b>Number of figures/tables /illustrations</b>      | 2                                                                         |
| <b>Circulation</b>                                  | 999999                                                                    |
| <b>Format</b>                                       | electronic                                                                |
| <b>Are you the author of this Elsevier article?</b> | Yes                                                                       |
| <b>Will you be translating?</b>                     | No                                                                        |
| <b>Title of new article</b>                         | Arrhythmias in Cardiac Sarcoidosis. Bench to Bedside: A Case-Based Review |
| <b>Lead author</b>                                  | Lynda E. Rosenfeld, MD                                                    |
| <b>Title of targeted journal</b>                    | Circulation: Arrhythmia and Electrophysiology                             |
| <b>Publisher</b>                                    | Lippincott Williams & Wilkins                                             |

Permission for Supplemental Tables 1 and 4:

**Expected publication date** Dec 2020

**Portions** The tables are not numbered. Wish to use the second part of the Table: Expert Consensus Recommendations on Criteria for the Diagnosis of CS and the Table: Expert Consensus Recommendations for ICD Implantation in patients with CS

Dr. Lynda Rosenfeld  
25 West Slope Lane

**Requestor Location**  
HAMDEN, CT 06517  
United States  
Attn: Dr. Lynda Rosenfeld

**Publisher Tax ID** 13-1958712

**Billing Type** Invoice

Dr. Lynda Rosenfeld  
25 West Slope Lane

**Billing Address**  
HAMDEN, CT 06517  
United States  
Attn: Dr. Lynda Rosenfeld

**Total** 0.00 USD

**Terms and Conditions**

### INTRODUCTION

1. The publisher for this copyrighted material is Elsevier. By clicking "accept" in connection with completing this licensing transaction, you agree that the following terms and conditions apply to this transaction (along with the Billing and Payment terms and conditions established by Copyright Clearance Center, Inc. ("CCC"), at the time that you opened your Rightslink account and that are available at any time at <http://myaccount.copyright.com>).

## GENERAL TERMS

2. Elsevier hereby grants you permission to reproduce the aforementioned material subject to the terms and conditions indicated.

3. Acknowledgement: If any part of the material to be used (for example, figures) has appeared in our publication with credit or acknowledgement to another source, permission must also be sought from that source. If such permission is not obtained then that material may not be included in your publication/copies. Suitable acknowledgement to the source must be made, either as a footnote or in a reference list at the end of your publication, as follows:

"Reprinted from Publication title, Vol /edition number, Author(s), Title of article / title of chapter, Pages No., Copyright (Year), with permission from Elsevier [OR APPLICABLE SOCIETY COPYRIGHT OWNER]." Also Lancet special credit - "Reprinted from The Lancet, Vol. number, Author(s), Title of article, Pages No., Copyright (Year), with permission from Elsevier."

4. Reproduction of this material is confined to the purpose and/or media for which permission is hereby given.

5. Altering/Modifying Material: Not Permitted. However figures and illustrations may be altered/adapted minimally to serve your work. Any other abbreviations, additions, deletions and/or any other alterations shall be made only with prior written authorization of Elsevier Ltd. (Please contact Elsevier's permissions helpdesk [here](#)). No modifications can be made to any Lancet figures/tables and they must be reproduced in full.

6. If the permission fee for the requested use of our material is waived in this instance, please be advised that your future requests for Elsevier materials may attract a fee.

7. Reservation of Rights: Publisher reserves all rights not specifically granted in the combination of (i) the license details provided by you and accepted in the course of this licensing transaction, (ii) these terms and conditions and (iii) CCC's Billing and Payment terms and conditions.

8. License Contingent Upon Payment: While you may exercise the rights licensed immediately upon issuance of the license at the end of the licensing process for the transaction, provided that you have disclosed complete and accurate details of your proposed use, no license is finally effective unless and until full payment is received from you (either by publisher or by CCC) as provided in CCC's Billing and Payment terms and conditions. If full payment is not received on a timely basis, then any license preliminarily granted shall be deemed automatically revoked and shall be void as if never granted. Further, in the event that you breach any of these terms and conditions or any of CCC's Billing and Payment terms and conditions, the license is automatically revoked and shall be void as if never granted. Use of materials as described in a revoked license, as well as any use of the materials beyond the scope of an unrevoked license, may constitute copyright infringement and publisher reserves the right to take any and all action to protect its copyright in the materials.

9. Warranties: Publisher makes no representations or warranties with respect to the licensed material.



Permission for Supplemental Tables 1 and 4:

**10. Indemnity:** You hereby indemnify and agree to hold harmless publisher and CCC, and their respective officers, directors, employees and agents, from and against any and all claims arising out of your use of the licensed material other than as specifically authorized pursuant to this license.

**11. No Transfer of License:** This license is personal to you and may not be sublicensed, assigned, or transferred by you to any other person without publisher's written permission.

**12. No Amendment Except in Writing:** This license may not be amended except in a writing signed by both parties (or, in the case of publisher, by CCC on publisher's behalf).

**13. Objection to Contrary Terms:** Publisher hereby objects to any terms contained in any purchase order, acknowledgment, check endorsement or other writing prepared by you, which terms are inconsistent with these terms and conditions or CCC's Billing and Payment terms and conditions. These terms and conditions, together with CCC's Billing and Payment terms and conditions (which are incorporated herein), comprise the entire agreement between you and publisher (and CCC) concerning this licensing transaction. In the event of any conflict between your obligations established by these terms and conditions and those established by CCC's Billing and Payment terms and conditions, these terms and conditions shall control.

**14. Revocation:** Elsevier or Copyright Clearance Center may deny the permissions described in this License at their sole discretion, for any reason or no reason, with a full refund payable to you. Notice of such denial will be made using the contact information provided by you. Failure to receive such notice will not alter or invalidate the denial. In no event will Elsevier or Copyright Clearance Center be responsible or liable for any costs, expenses or damage incurred by you as a result of a denial of your permission request, other than a refund of the amount(s) paid by you to Elsevier and/or Copyright Clearance Center for denied permissions.

### **LIMITED LICENSE**

The following terms and conditions apply only to specific license types:

**15. Translation:** This permission is granted for non-exclusive world **English** rights only unless your license was granted for translation rights. If you licensed translation rights you may only translate this content into the languages you requested. A professional translator must perform all translations and reproduce the content word for word preserving the integrity of the article.

**16. Posting licensed content on any Website:** The following terms and conditions apply as follows: Licensing material from an Elsevier journal: All content posted to the web site must maintain the copyright information line on the bottom of each image; A hyper-text must be included to the Homepage of the journal from which you are licensing at <http://www.sciencedirect.com/science/journal/xxxxx> or the Elsevier homepage for books at <http://www.elsevier.com>; Central Storage: This license does not include permission for a scanned version of the material to be stored in a central repository such as that provided by Heron/XanEdu.

Licensing material from an Elsevier book: A hyper-text link must be included to the Elsevier homepage at <http://www.elsevier.com>. All content posted to the web site must maintain the copyright information line on the bottom of each image.

Permission for Supplemental Tables 1 and 4:

**Posting licensed content on Electronic reserve:** In addition to the above the following clauses are applicable: The web site must be password-protected and made available only to bona fide students registered on a relevant course. This permission is granted for 1 year only. You may obtain a new license for future website posting.

17. **For journal authors:** the following clauses are applicable in addition to the above:

**Preprints:**

A preprint is an author's own write-up of research results and analysis, it has not been peer-reviewed, nor has it had any other value added to it by a publisher (such as formatting, copyright, technical enhancement etc.).

Authors can share their preprints anywhere at any time. Preprints should not be added to or enhanced in any way in order to appear more like, or to substitute for, the final versions of articles however authors can update their preprints on arXiv or RePEc with their Accepted Author Manuscript (see below).

If accepted for publication, we encourage authors to link from the preprint to their formal publication via its DOI. Millions of researchers have access to the formal publications on ScienceDirect, and so links will help users to find, access, cite and use the best available version. Please note that Cell Press, The Lancet and some society-owned have different preprint policies. Information on these policies is available on the journal homepage.

**Accepted Author Manuscripts:** An accepted author manuscript is the manuscript of an article that has been accepted for publication and which typically includes author-incorporated changes suggested during submission, peer review and editor-author communications.

Authors can share their accepted author manuscript:

- immediately
  - via their non-commercial person homepage or blog
  - by updating a preprint in arXiv or RePEc with the accepted manuscript
  - via their research institute or institutional repository for internal institutional uses or as part of an invitation-only research collaboration work-group
  - directly by providing copies to their students or to research collaborators for their personal use
  - for private scholarly sharing as part of an invitation-only work group on commercial sites with which Elsevier has an agreement
- After the embargo period
  - via non-commercial hosting platforms such as their institutional repository
  - via commercial sites with which Elsevier has an agreement

In all cases accepted manuscripts should:

- link to the formal publication via its DOI
- bear a CC-BY-NC-ND license - this is easy to do
- if aggregated with other manuscripts, for example in a repository or other site, be shared in alignment with our hosting policy not be added to or enhanced in any way to appear more like, or to substitute for, the published journal article.

Permission for Supplemental Tables 1 and 4:

**Published journal article (JPA):** A published journal article (PJA) is the definitive final record of published research that appears or will appear in the journal and embodies all value-adding publishing activities including peer review co-ordination, copy-editing, formatting, (if relevant) pagination and online enrichment.

Policies for sharing publishing journal articles differ for subscription and gold open access articles:

**Subscription Articles:** If you are an author, please share a link to your article rather than the full-text. Millions of researchers have access to the formal publications on ScienceDirect, and so links will help your users to find, access, cite, and use the best available version.

Theses and dissertations which contain embedded PJAs as part of the formal submission can be posted publicly by the awarding institution with DOI links back to the formal publications on ScienceDirect.

If you are affiliated with a library that subscribes to ScienceDirect you have additional private sharing rights for others' research accessed under that agreement. This includes use for classroom teaching and internal training at the institution (including use in course packs and courseware programs), and inclusion of the article for grant funding purposes.

**Gold Open Access Articles:** May be shared according to the author-selected end-user license and should contain a [CrossMark logo](#), the end user license, and a DOI link to the formal publication on ScienceDirect.

Please refer to Elsevier's [posting policy](#) for further information.

18. **For book authors** the following clauses are applicable in addition to the above: Authors are permitted to place a brief summary of their work online only. You are not allowed to download and post the published electronic version of your chapter, nor may you scan the printed edition to create an electronic version. **Posting to a repository:** Authors are permitted to post a summary of their chapter only in their institution's repository.

19. **Thesis/Dissertation:** If your license is for use in a thesis/dissertation your thesis may be submitted to your institution in either print or electronic form. Should your thesis be published commercially, please reapply for permission. These requirements include permission for the Library and Archives of Canada to supply single copies, on demand, of the complete thesis and include permission for Proquest/UMI to supply single copies, on demand, of the complete thesis. Should your thesis be published commercially, please reapply for permission. Theses and dissertations which contain embedded PJAs as part of the formal submission can be posted publicly by the awarding institution with DOI links back to the formal publications on ScienceDirect.



Permission for Supplemental Tables 1 and 4:

### **Elsevier Open Access Terms and Conditions**

You can publish open access with Elsevier in hundreds of open access journals or in nearly 2000 established subscription journals that support open access publishing. Permitted third party re-use of these open access articles is defined by the author's choice of Creative Commons user license. See our [open access license policy](#) for more information.

#### **Terms & Conditions applicable to all Open Access articles published with Elsevier:**

Any reuse of the article must not represent the author as endorsing the adaptation of the article nor should the article be modified in such a way as to damage the author's honour or reputation. If any changes have been made, such changes must be clearly indicated.

The author(s) must be appropriately credited and we ask that you include the end user license and a DOI link to the formal publication on ScienceDirect.

If any part of the material to be used (for example, figures) has appeared in our publication with credit or acknowledgement to another source it is the responsibility of the user to ensure their reuse complies with the terms and conditions determined by the rights holder.

#### **Additional Terms & Conditions applicable to each Creative Commons user license:**

**CC BY:** The CC-BY license allows users to copy, to create extracts, abstracts and new works from the Article, to alter and revise the Article and to make commercial use of the Article (including reuse and/or resale of the Article by commercial entities), provided the user gives appropriate credit (with a link to the formal publication through the relevant DOI), provides a link to the license, indicates if changes were made and the licensor is not represented as endorsing the use made of the work. The full details of the license are available at <http://creativecommons.org/licenses/by/4.0>.

**CC BY NC SA:** The CC BY-NC-SA license allows users to copy, to create extracts, abstracts and new works from the Article, to alter and revise the Article, provided this is not done for commercial purposes, and that the user gives appropriate credit (with a link to the formal publication through the relevant DOI), provides a link to the license, indicates if changes were made and the licensor is not represented as endorsing the use made of the work. Further, any new works must be made available on the same conditions. The full details of the license are available at <http://creativecommons.org/licenses/by-nc-sa/4.0>.

**CC BY NC ND:** The CC BY-NC-ND license allows users to copy and distribute the Article, provided this is not done for commercial purposes and further does not permit distribution of the Article if it is changed or edited in any way, and provided the user gives appropriate credit (with a link to the formal publication through the relevant DOI), provides a link to the license, and that the licensor is not represented as endorsing the use made of the work. The full details of the license are available at <http://creativecommons.org/licenses/by-nc-nd/4.0>. Any commercial reuse of Open Access articles published with a CC BY NC SA or CC BY NC ND license requires permission from Elsevier and will be subject to a fee.



Permission for Supplemental Tables 1 and 4:

Commercial reuse includes:

- Associating advertising with the full text of the Article
- Charging fees for document delivery or access
- Article aggregation
- Systematic distribution via e-mail lists or share buttons

Posting or linking by commercial companies for use by customers of those companies.

**20. Other Conditions:**

v1.10

Questions? [customercare@copyright.com](mailto:customercare@copyright.com) or +1-855-239-3415 (toll free in the US) or +1-978-646-2777.

**20. Other Conditions:**

v1.10

Questions? [customercare@copyright.com](mailto:customercare@copyright.com) or +1-855-239-3415 (toll free in the US) or +1-978-646-2777.

Permission for Supplemental Table 2:

**Circulation Reports : Secondary Use Permission Form**

59

<NOTE>- Please **DO NOT** leave any field blank. We will NOT accept applications with blank field.

What do you like to use?

|                                                                                                                            |    |                              |                 |
|----------------------------------------------------------------------------------------------------------------------------|----|------------------------------|-----------------|
| Circulation Reports Manuscripts DOI: <a href="https://doi.org/10.1253/circrep.CR-">https://doi.org/10.1253/circrep.CR-</a> |    | doi:10.1253/circj.CJ-19-0508 |                 |
| Figure #                                                                                                                   | NA | Table #                      | 10              |
| First several words of the Article title                                                                                   |    | JCS 2016 Guideline           | Documents<br>NA |
|                                                                                                                            |    | First Author                 | Terasaki, Fumio |

Where will you use this content(s)? / What is the purpose of your use?

We have written a review article entitled: Arrhythmias in Cardiac Sarcoidosis. Bench to Bedside: A Case-Based Review, which has been accepted for publication in Circulation: Arrhythmia and Electrophysiology, an online journal. I am writing to request permission to reproduce a facsimile of Table 10 (Diagnostic Guidelines for Cardiac Sarcoidosis) in the article by Terasaki et al: JCS 2016 Guideline on Diagnosis and Treatment of Cardiac Sarcoidosis. Digest Version. Circ J 2019;83:2329-2388 in the supplementary data for our article. This is to be used for educational purposes only.

|                                                                                                                                                               |                                                 |                                                                                                             |                                               |
|---------------------------------------------------------------------------------------------------------------------------------------------------------------|-------------------------------------------------|-------------------------------------------------------------------------------------------------------------|-----------------------------------------------|
| Format                                                                                                                                                        | 06                                              | Please select only one of the following options. Respective forms are required for use in multiple formats. |                                               |
| 1) Journal 2) Book 3) Offprints 4) Other print format 5) Digital format 6) Online Journal 7) eBook 8) Website<br>9) Journal + Online Journal 10) Book + eBook |                                                 |                                                                                                             |                                               |
| Language                                                                                                                                                      | Let us know if you are translating the article. |                                                                                                             | English. We are not translating this article. |
| # of copies/Circulation                                                                                                                                       | Required if you select Format 1)-4).            |                                                                                                             | NA                                            |
| Release date                                                                                                                                                  | e.g. August 1, 2016                             |                                                                                                             | ASAP within the next month                    |

**Your information**

|                 |                    |                               |                                                                        |       |                          |
|-----------------|--------------------|-------------------------------|------------------------------------------------------------------------|-------|--------------------------|
| Applicant Agent | Lynda E. Rosenfeld | Affiliation Agent Affiliation | Section of Cardiovascular Medicine, Yale University School of Medicine |       |                          |
|                 | NA                 |                               | NA                                                                     |       |                          |
| Contact Tel.    | 010-1-203-915-6256 | Fax                           | 010-1-203-785-6506                                                     | Email | lynda.rosenfeld@yale.edu |

\*\*\*\*\*FOR OFFICE USE ONLY (LEAVE BELOW BLANK)\*\*\*\*\*

We ask you to pay ¥ 0 for the royalty fee.

\*Please pay full amount as noted in the invoice.

\*We will give you permission only after confirmation of the payment.

\*The source must be clearly indicated for the use.

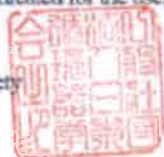



Permission for Supplemental Table 5:

Signing complete

Completed

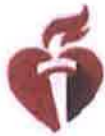

**American  
Heart  
Association.**

**Inv #16644-LROSENFELD**  
Fees waived for volunteer and Dickfeld/Joglar, authors

December 9, 2020

**ELECTRONIC COPYRIGHT USE AGREEMENT**

Lynda Rosenfeld  
Yale University School of Medicine  
25 West Slope Lane  
Hamden, CT 06517

Dear Dr. Rosenfeld:

**Amount Due: \$0.00 U.S.FUNDS (WAIVED)** (This is a fee for service, not a charitable contribution). Our tax id number is 13-5613797. Please consider this letter an invoice.

Approval of this request is contingent upon receipt of a \$0.00 U.S Funds processing fee and a signed copy of this Agreement (including Exhibit A) Please send a check (drawn on a U.S. Bank or an international money order) payable to the American Heart Association with a copy of this Agreement to PO Box 841750, Dallas, Texas, 75284-1750. Bank transfer or credit card payment information will be provided upon request.

The conditions of this copyright use agreement are listed below and the specifics of the material to be used are set out on Exhibit A to this Agreement.

1. A credit line must be prominently placed on the page in which the American Heart Association materials appear as shown in Exhibit A.
2. This Agreement shall not be assigned or transferred to an undisclosed third-party without the prior written consent of the AHA. Further, the Requestor represents and affirms that they are requesting the material listed in Exhibit A for their own use and not as an agent or representative of an undisclosed third-party.
3. Original artwork cannot be supplied, and the requestor agrees to reprint the material exactly as originally published. The American Heart Association (AHA) logo and AHA Service Marks may only be used as they appear on the materials requested. Obvious

American Heart Association, Inc. 17272 Greenville Avenue | Dallas | Texas 75231

You completed signing all your documents

FINISHED

typographical errors may be corrected and typography may be altered to conform to the proposed publication. No other deletions, alterations, or other changes may be made without the prior written consent of the AHA.

4. American Heart Association materials are developed for educational non-profit use only. We do not allow use of our materials to promote commercial products or companies or to imply an endorsement of, or affiliation with any organization.
5. This permission is granted on a one-time use basis. Rights granted herein are not exclusive and do not apply to future reproductions, editions, revisions, or other derivative works including foreign language editions, and do not apply to any versions via electronic media, including but not limited to "Open Access journals", other than those specified in Exhibit "A".
6. American Heart Association information must be posted as a "read only" document.
7. The page where the AHA information appears must include a notation that the information is used with permission and that all requests to use this information must come through the AHA.
8. Page must include a link back to the full document on the AHA site.
9. This permission is not valid until we receive payment, verifying email if paid electronically and a signed copy of this agreement. If the payment and the signed agreement are not received within 30 days, the request will be considered withdrawn and no longer in effect. No reminder notices will be sent.

Upon receipt of payment and the signed agreement, permission will be granted on your original request. Your cancelled check or credit card statement will be your receipt.

E-SIGNED by Lynda Rosenfeld  
on 2020-12-09 18:04:59 CST

Signature of Requestor \_\_\_\_\_

Printed Name \_\_\_\_\_

December 09, 2020  
Date \_\_\_\_\_

## **EXHIBIT A**

**Publication Name** – Circulation.2018;138:e272-e391  
2017 AHA/ACC/HRS Guideline for Management of Patients With Ventricular  
Arrhythmias and the Prevention of Sudden Cardiac Death

**Specifically:**

Page e318, Table 7.6. Cardiac Sarcoidosis: Recommendations for Cardiac Sarcoidosis

**Citation/Credit Line:**

Reprinted with permission  
Circulation.2018;138:e272-e391  
©2017 American Heart Association, Inc., American College of Cardiology  
Foundation and the Heart Rhythm Society

**For Use In:**

an online journal version of the above referenced material will be used in a new article  
titled “Arrhythmias and Sarcoidosis. Bench to Bedside: A Case-Based Review”.

Note: AHA material may not be used in any Open Access publications/systems
